# Supplementary material
Source: publisher site journal article supplement (https://www.dovepress.com/article/399785)

**Supplement Figure 1**


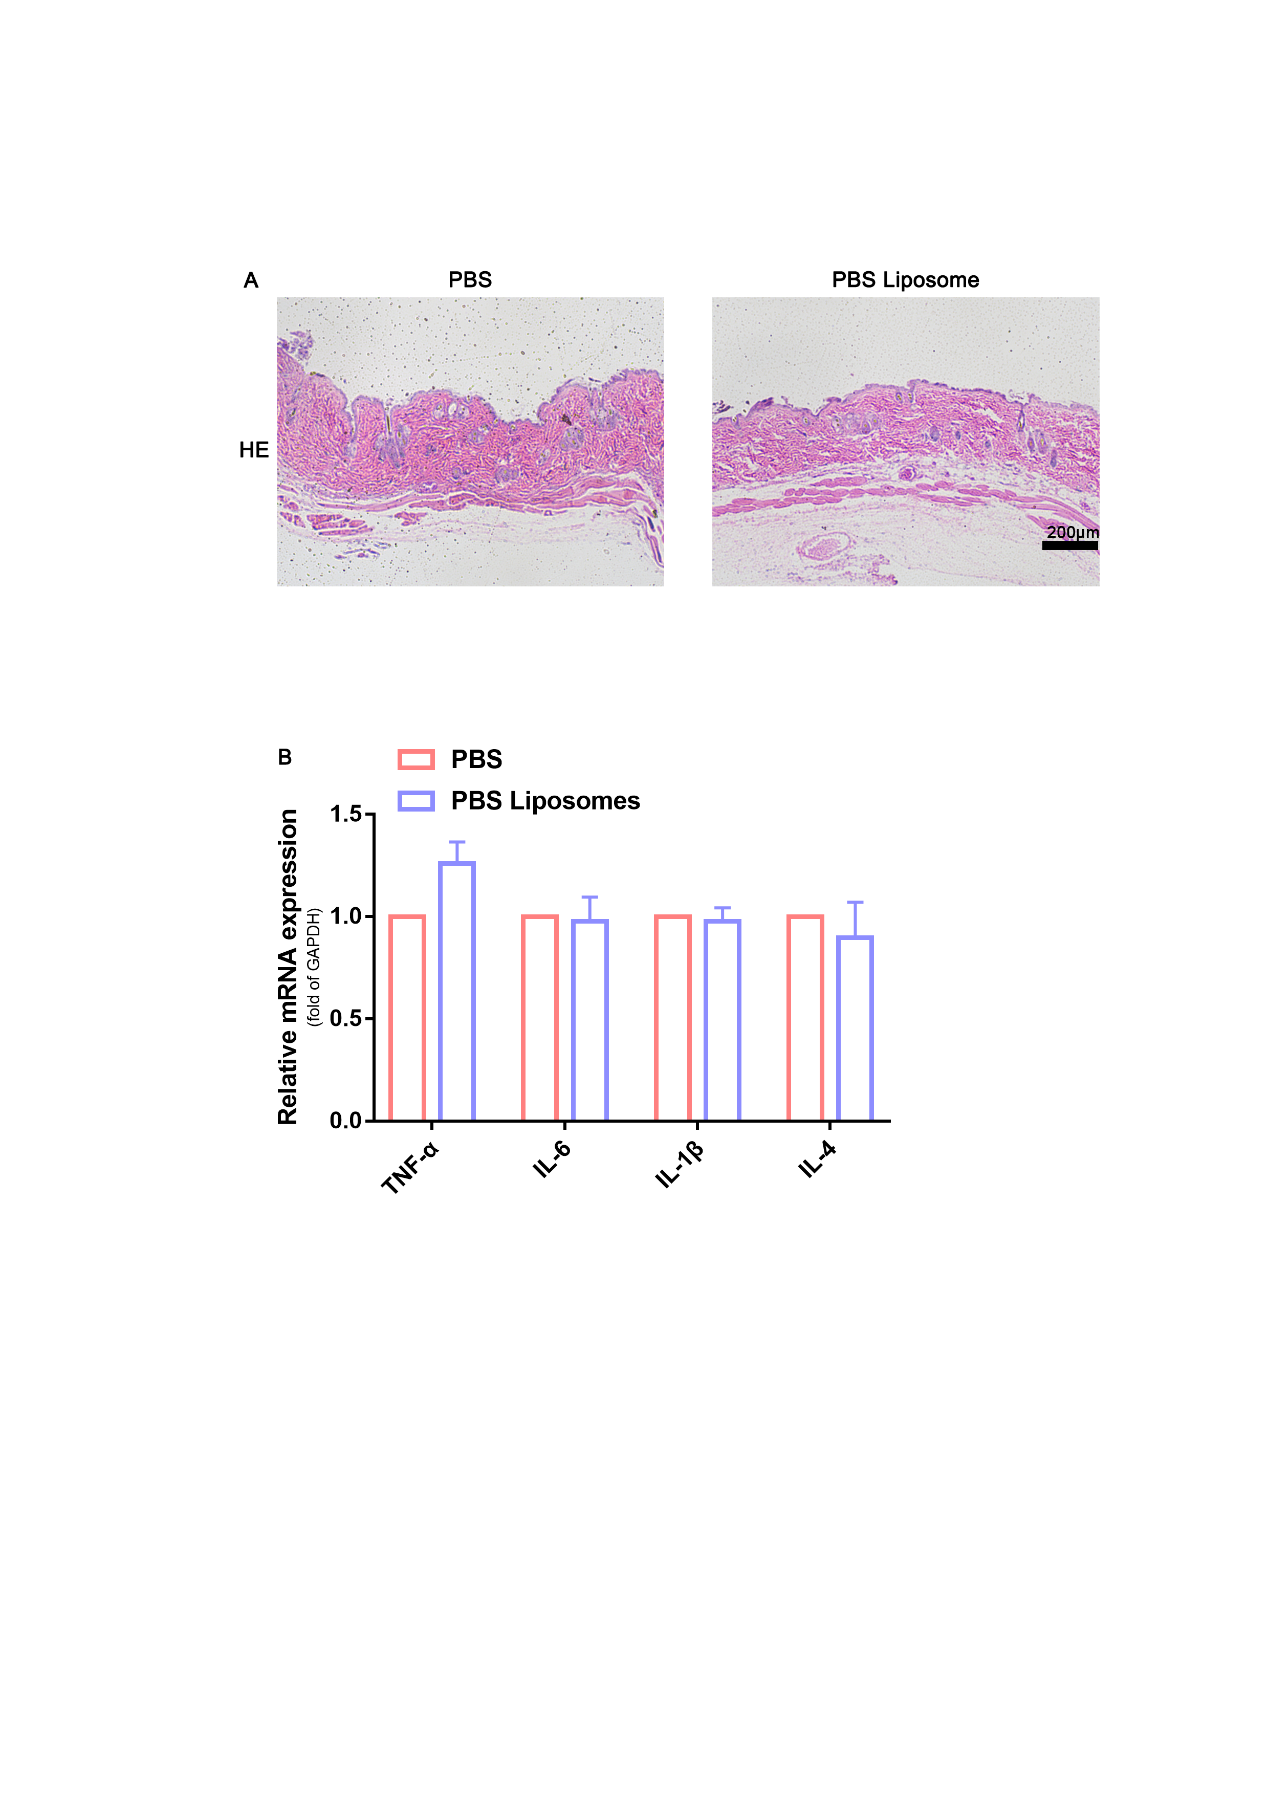


Supplement Figure 1 The toxicity of liposomes or PBS treated mice in normal C57BL/6 mice. (A) Skin from normal mice oral treated with PBS or PBS liposomes were analysed by H&E, Scale bar:200μm. (B) mRNA expression levels of indicated genes in skin of PBS or PBS liposomes treated C57BL/6 mice.

**Supplement Figure 2**

Supplement Figure 2 Protein expression of [macrophage polarization](javascript:;)-related surface markers CD11b and CD14, normalized to GAPDH, determined by western blot analysis.


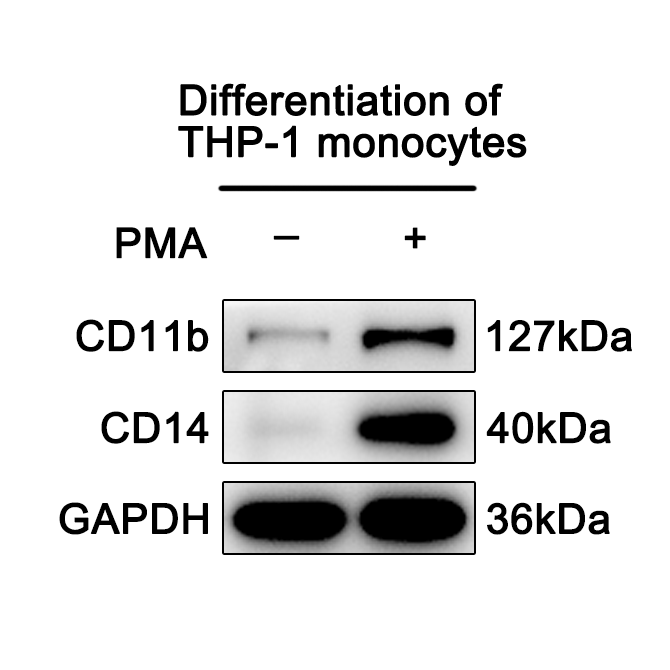


**Supplement Figure 3**

Supplement Figure 3 The uptake of KCs-exo by PMA-treated THP-1 cells observed under an inverted microscope (600x), blue flurescence represents nucleus, red flurescence represents exosomes, Scale bar: 10μm.

**
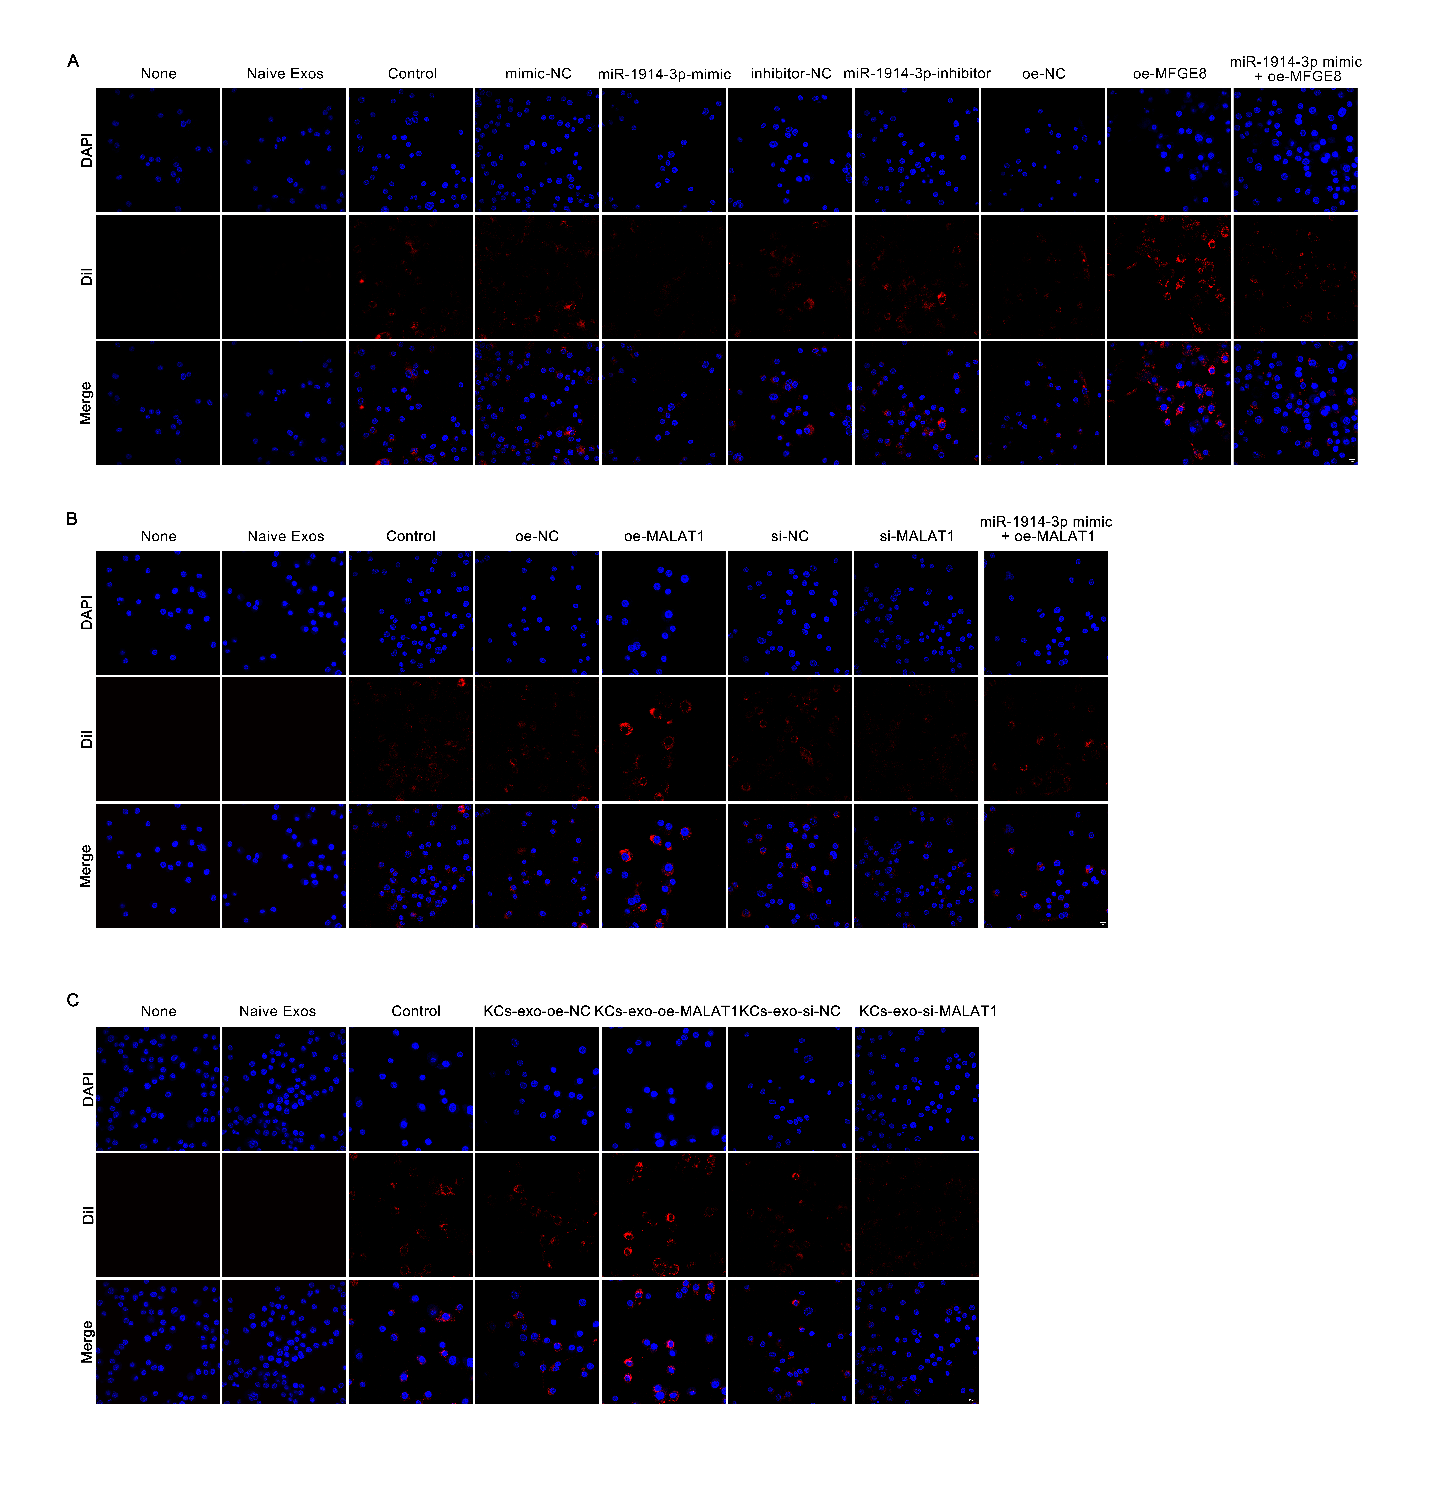
**

**Supplement Figure 4**

Supplement Figure 4 Protein expression of [macrophage polarization](javascript:;)-related surface markers (iNOS, Arg-1 and CD206), normalized to GAPDH, determined by western blot analysis.


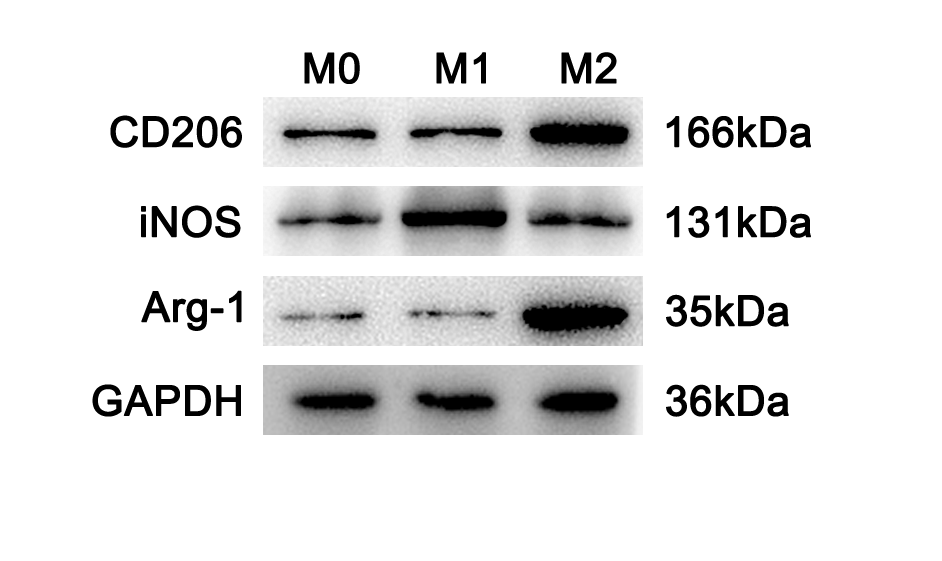

Supplement: Supplementary file 1 [file get_supplementary_file.php]
